# Supplementary material for: Expert Consensus on Morphofunctional Assessment in Disease-Related Malnutrition. Grade Review and Delphi Study
Source: MDPI journal article supplement (doi:10.3390/nu15030612), 2023-01-25
Supplement: s1 [file s1]

**SUPPLEMENTARY TABLE S1.** Analysis of quantitative and qualitative agreement between surveys by topic.

|                                                      | Spearman<br>correlation | p      | Kappa<br>index | p      |
|------------------------------------------------------|-------------------------|--------|----------------|--------|
| TOTAL (37 statements)                                | 0.846                   | <0.001 | 0.580          | <0.001 |
| Food intake and nutrient assimilation (5 statements) | 0.545                   | <0.001 | 0.260          | <0.001 |
| Anthropometry (6 statements)                         | 0.788                   | <0.001 | 0.597          | <0.001 |
| Biochemistry (9 statements)                          | 0.922                   | <0.001 | 0.660          | <0.001 |
| Dynamometry (2 statements)                           | 0.737                   | <0.001 | 0.462          | <0.001 |
| Body composition (2 statements)                      | 0.787                   | <0.001 | 0.540          | <0.001 |
| Imaging (6 statements)                               | 0.729                   | <0.001 | 0.517          | <0.001 |
| Functional status and quality of life (7 statements) | 0.763                   | <0.001 | 0.447          | <0.001 |
