# Supplementary material for: Expert Consensus on Morphofunctional Assessment in Disease-Related Malnutrition. Grade Review and Delphi Study
Source: Nutrients. 2023 Jan 25;15(3):612. doi: 10.3390/nu15030612 (PMC9920608; doi:10.3390/nu15030612)
Supplement: Supplementary file 1 [file nutrients-15-00612-s001.zip]

Archive with 4 entries (4 files):
- Supplementary Information S1_22_05_2022.pdf
- Supplementary Information S2_GRADE Tables_FINAL.pdf
- SUPPLEMENTARY INFORMATION S3.pdf
- SUPPLEMENTARY TABLE S1.pdf
